# Supplementary material for: Electrocatalytic oxygen evolution with a cobalt complex
Source: Royal Society of Chemistry journal article supplement (doi:10.1039/c7dt03653a), 2017-01-01
Supplement: c7dt03653a1.pdf [file c7dt03653a1.pdf]

*Electronic Supplementary Information* for

**Electrocatalytic Oxygen Evolution with a Cobalt Complex**

Hua-Tian Shi, Xiu-Xiu Li, Fang-Hui Wu, and Wei-Bin Yu\*

*Analysis and Testing Central Facility, Engineering Research Institute, Anhui University of Technology,  
Maanshan 243002, P. R. China*

**Table of Contents**

1. Table S1: Single-Crystal Structure Determination
2. Figure S1 and Figure S2: NMR Spectra of the cobalt complex.
3. Figure S3: IR spectrum of the cobalt complex.
4. Figure S4: UV-Vis spectrum of the cobalt complex.
5. Figure S5: TGA curve of the cobalt complex.

**Table S1.** Crystallographic data and structure refinement parameters for the cobalt complex.

| 1                                                                                                |                                                                                 |
|--------------------------------------------------------------------------------------------------|---------------------------------------------------------------------------------|
| formula                                                                                          | C <sub>36</sub> H <sub>38</sub> CoN <sub>4</sub> O <sub>12</sub> S <sub>2</sub> |
| <i>Mr</i>                                                                                        | 841.75                                                                          |
| crystal system                                                                                   | Monoclinic                                                                      |
| space group                                                                                      | <i>P</i> 21/ <i>c</i>                                                           |
| <i>a</i> [Å]                                                                                     | 17.7878(13)                                                                     |
| <i>b</i> [Å]                                                                                     | 34.714(6)                                                                       |
| <i>c</i> [Å]                                                                                     | 7.1082(11)                                                                      |
| $\alpha$ [°]                                                                                     | 90                                                                              |
| $\beta$ [°]                                                                                      | 105.722(2)                                                                      |
| $\gamma$ [°]                                                                                     | 90                                                                              |
| <i>V</i> [Å <sup>3</sup> ]                                                                       | 1849.8(5)                                                                       |
| <i>T</i> [K]                                                                                     | 296(2)                                                                          |
| <i>Z</i>                                                                                         | 2                                                                               |
| $\rho_{\text{calcd}}$ [g cm <sup>-3</sup> ]                                                      | 1.511                                                                           |
| $\mu$ [mm <sup>-1</sup> ]                                                                        | 0.647                                                                           |
| <i>F</i> (000)                                                                                   | 874                                                                             |
| data/restraints/parameters                                                                       | 4215 / 0 / 261                                                                  |
| <i>R</i> <sub>1</sub> / <i>wR</i> <sub>2</sub> [ <i>I</i> >2 $\sigma$ ( <i>I</i> )] <sup>a</sup> | 0.0720/0.1857                                                                   |
| <i>R</i> <sub>1</sub> / <i>wR</i> <sub>2</sub> (all data) <sup>a</sup>                           | 0.1048/0.2071                                                                   |
| goodness-of-fit                                                                                  | 0.959                                                                           |
| largest residuals [e Å <sup>-3</sup> ]                                                           | 1.662 and -0.375                                                                |

<sup>a</sup> $R_1 = \sum ||F_o| - |F_c||$  (based on reflections with  $F_o^2 > 2\sigma F^2$ );  $wR_2 = \{\sum[\omega(F_o^2 - F_c^2)^2] / \sum[\omega(F_o^2)^2]\}^{1/2}$ ;  $w = 1/[\sigma^2 F_o^2 + (0.095P)^2]$ ;  $P = [\max(F_o^2, 0) + 2F_c^2] / 3$  (also with  $F_o^2 > 2\sigma F^2$ )

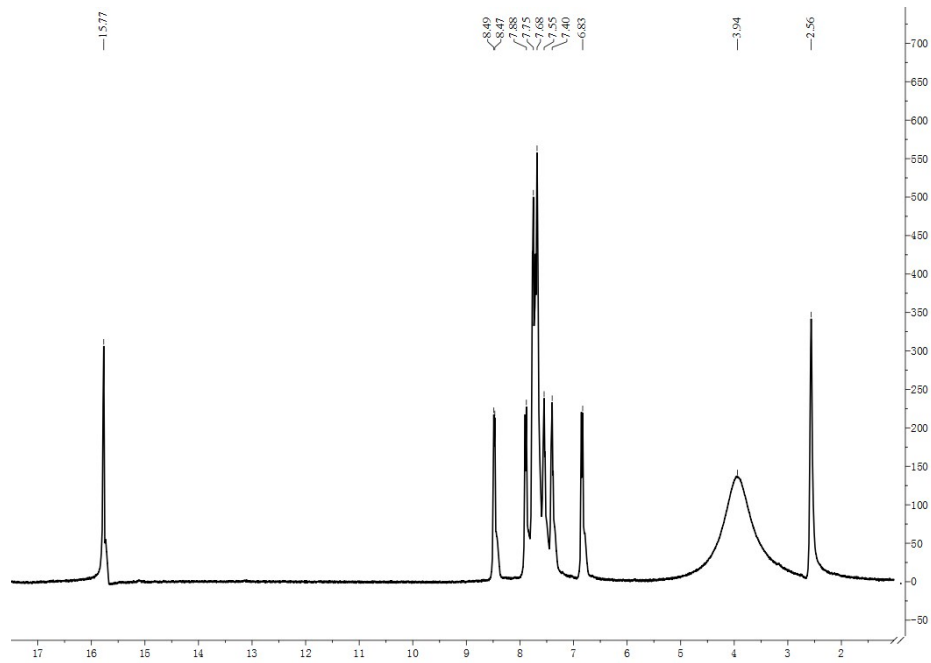

**Figure S1.**  $^1\text{H}$  NMR spectrum of the cobalt complex.

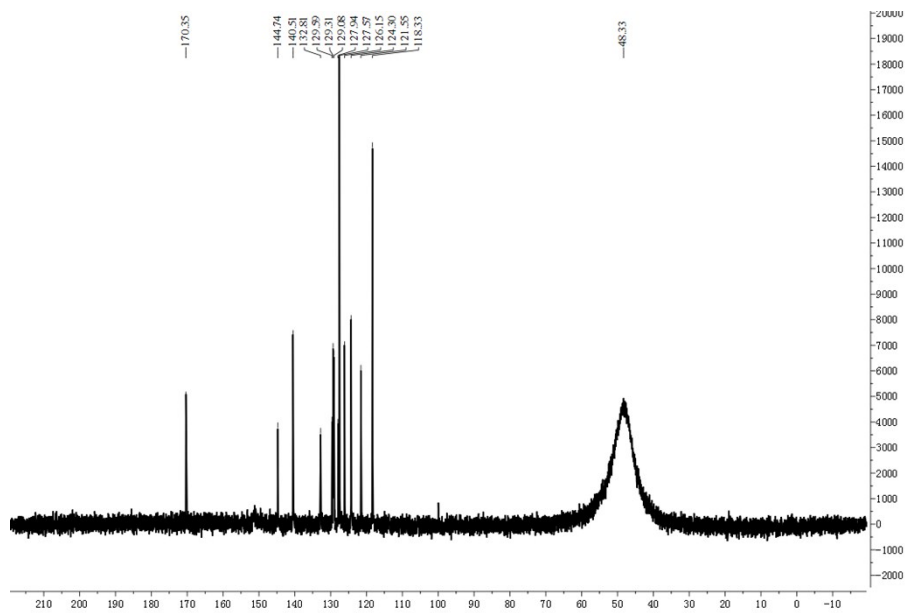

**Figure S2.**  $^{13}\text{C}$  NMR spectrum of the cobalt complex.

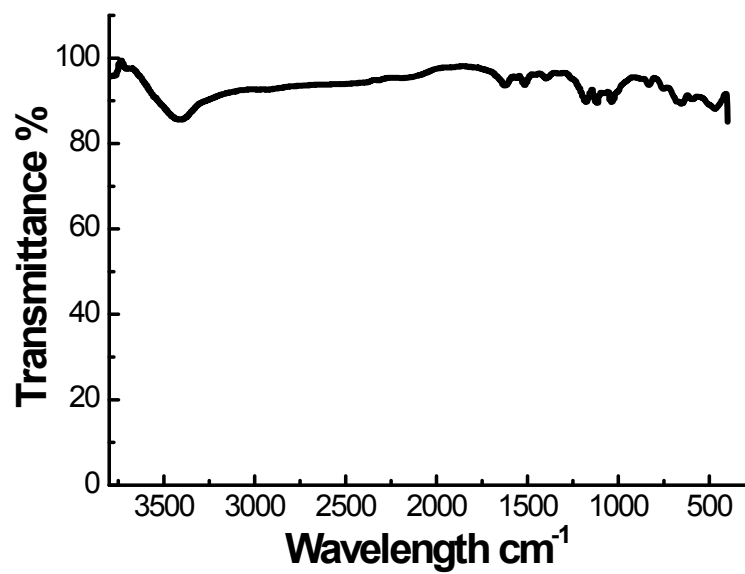

**Figure S3.** The IR spectrum of the cobalt complex.

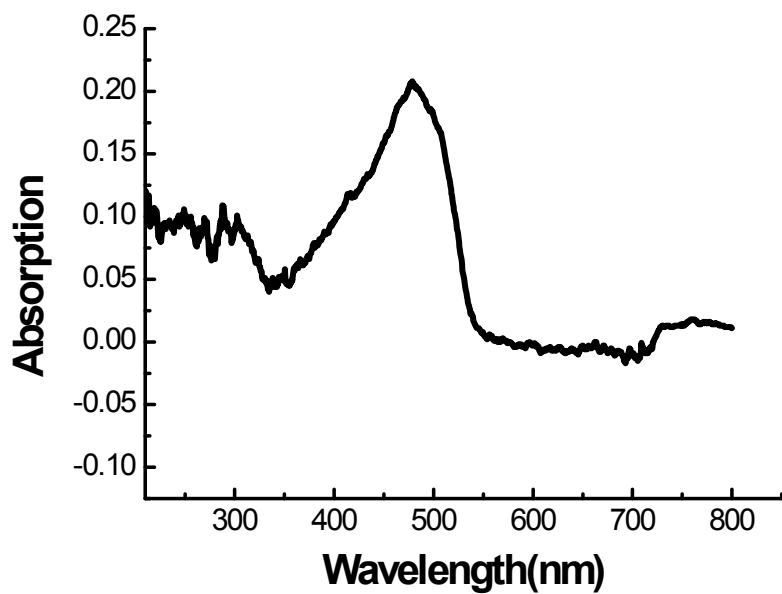

**Figure S4.** The UV-vis spectrum of the cobalt complex.

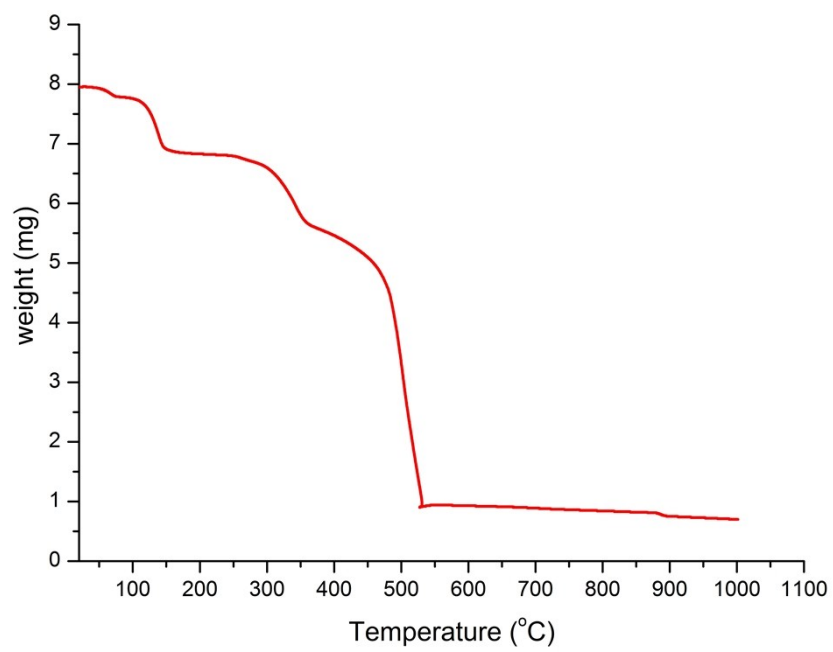

**Figure S5.** TGA curve of the cobalt complex.
